# Supplementary material for: Highly visible light active Ag@TiO2 nanocomposites synthesized using an electrochemically active biofilm: a novel biogenic approach
Source: Royal Society of Chemistry journal article supplement (doi:10.1039/c3nr00613a), 2013-01-01
Supplement: c3nr00613a.pdf [file c3nr00613a.pdf]

## Electronic Supplementary Information

### Visible light active Ag@TiO<sub>2</sub> nanocomposite synthesized by electrochemically active biofilm: A novel biogenic approach

M. Mansoob Khan<sup>a</sup>, Sajid A. Ansari<sup>a</sup>, M. Ikhlasul Amal<sup>b</sup>, Jintae Lee<sup>a</sup>, and Moo Hwan Cho<sup>a\*</sup>

<sup>a</sup>School of Chemical Engineering, Yeungnam University, Gyeongsan-si, Gyeongbuk 712-749, South Korea. Phone: 82-53-810-2517; Fax: 82-53- 810-4631, \*Email: [mhcho@ynu.ac.kr](mailto:mhcho@ynu.ac.kr)

<sup>b</sup>Materials Science and Engineering, Yeungnam University, Gyeongsan-si, Gyeongbuk 712-749, South Korea.

#### UV-vis diffuse absorption spectra of Ag@TiO<sub>2</sub> nanocomposites and pure TiO<sub>2</sub>

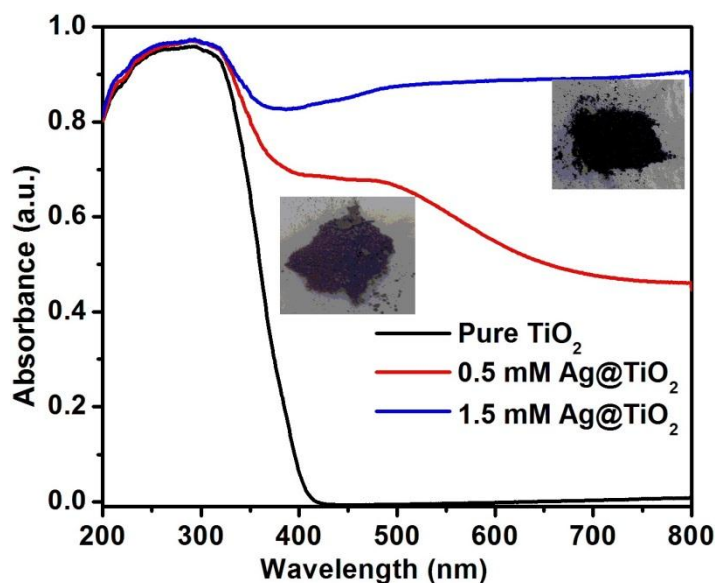

Fig. S1. UV-vis diffuse absorption spectra of Ag@TiO<sub>2</sub> nanocomposites and pure TiO<sub>2</sub>

**SEM image of 0.5 mM Ag@TiO<sub>2</sub> nanocomposites**

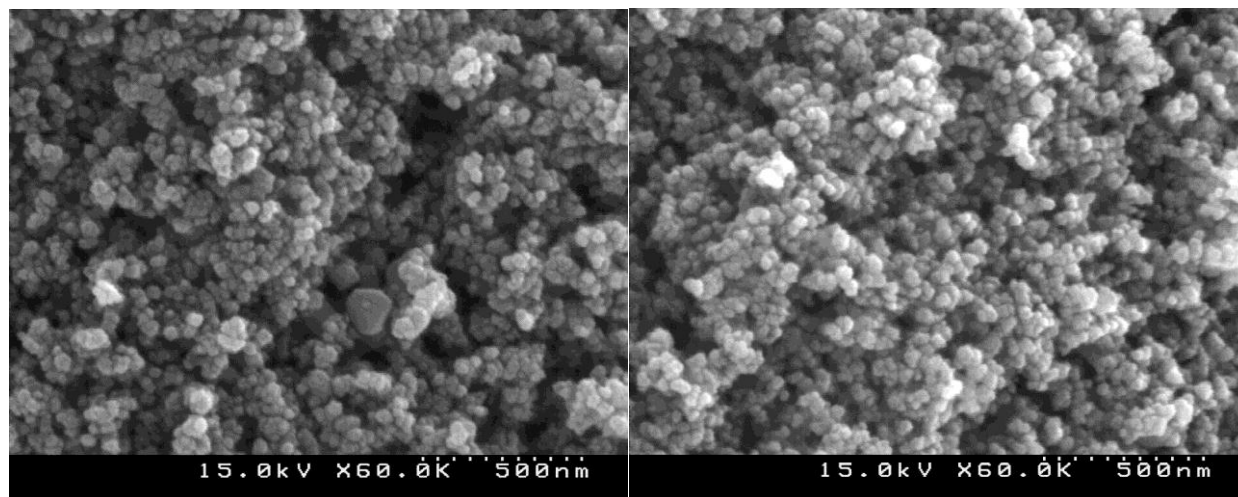

**Fig. S2.** SEM image of Ag@TiO<sub>2</sub> nanocomposites.

**Acquire HAADF of 0.5 mM Ag@TiO<sub>2</sub> nanocomposites**

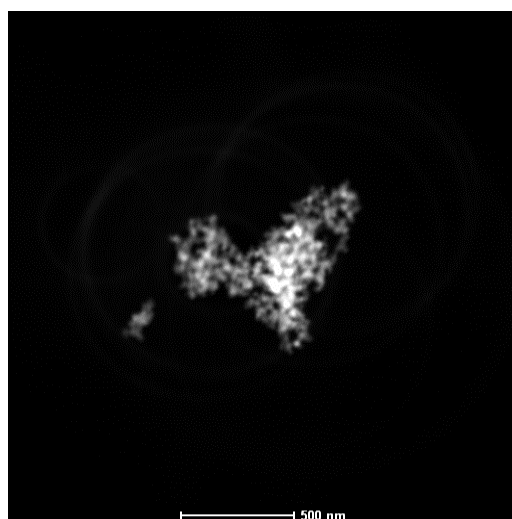

**Fig. S3.** Representative HAADF FE-TEM image of 0.5 mM Ag@TiO<sub>2</sub> nanocomposites.

### EDX of 0.5 mM Ag@TiO<sub>2</sub> nanocomposites

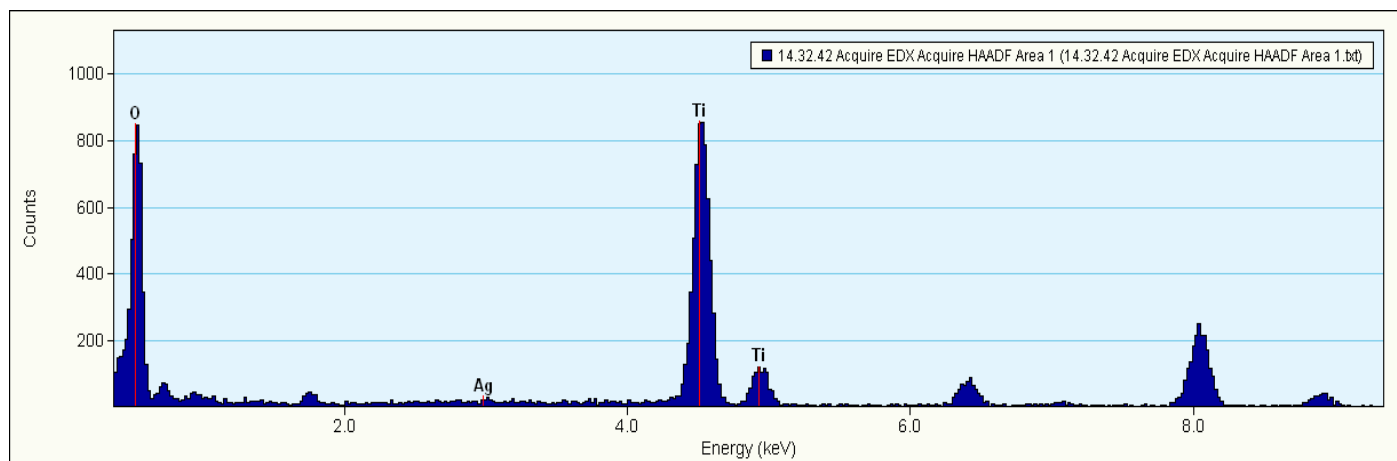

Fig. S4. EDX of 0.5 mM Ag@TiO<sub>2</sub> nanocomposites.

Table S1. Elemental composition of 0.5 mM Ag@TiO<sub>2</sub> nanocomposites

| Element | Weight % | Atomic % | Uncert. % | Detector correction | k-Factor |
|---------|----------|----------|-----------|---------------------|----------|
| O(K)    | 42.67    | 69.57    | 0.95      | 0.49                | 1.974    |
| Ti(K)   | 54.68    | 29.78    | 0.72      | 0.98                | 1.229    |
| Ag(K)   | 2.63     | 0.63     | 0.30      | 0.98                | 6.491    |

### SEM image of 1.5 mM Ag@TiO<sub>2</sub> nanocomposites

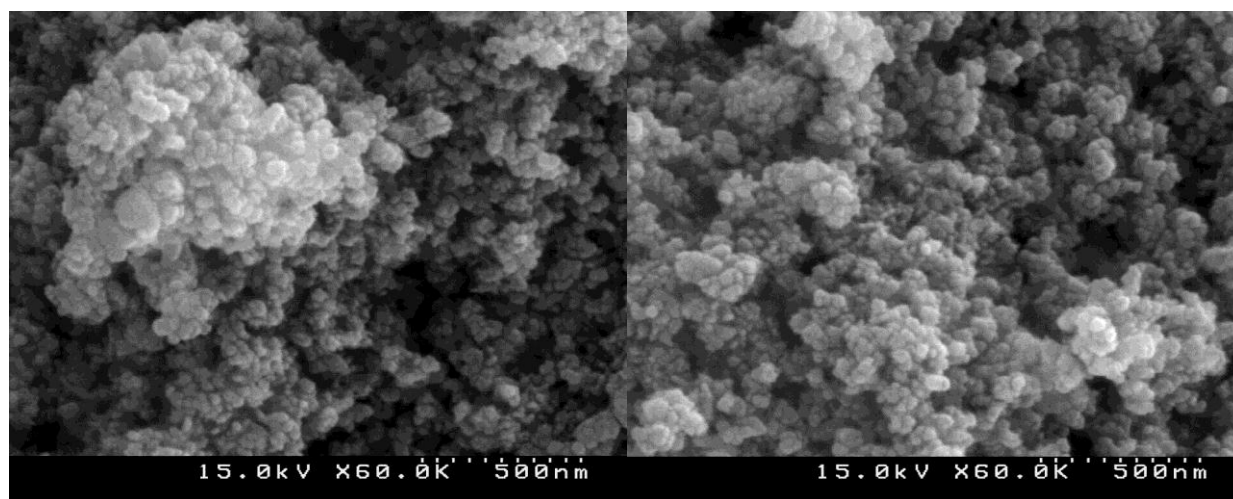

Fig. S5. SEM image of 1.5 mM Ag@TiO<sub>2</sub> nanocomposites.

### Acquire HAADF of 1.5 mM Ag@TiO<sub>2</sub> nanocomposites

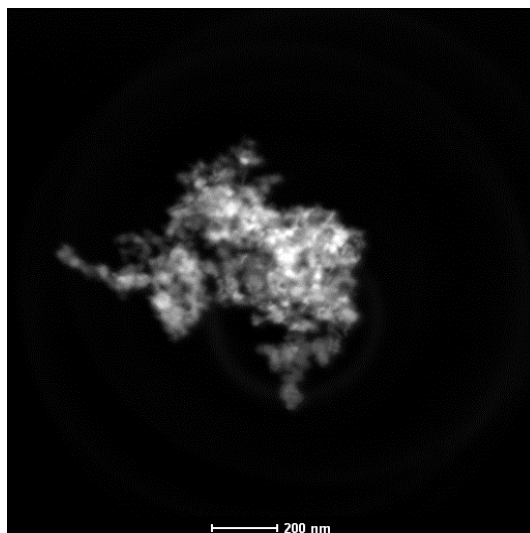

**Fig. S6.** Representative HAADF FE-TEM image of 1.5 mM Ag@TiO<sub>2</sub> nanocomposites.

### EDX of 1.5 mM Ag@TiO<sub>2</sub> nanocomposites

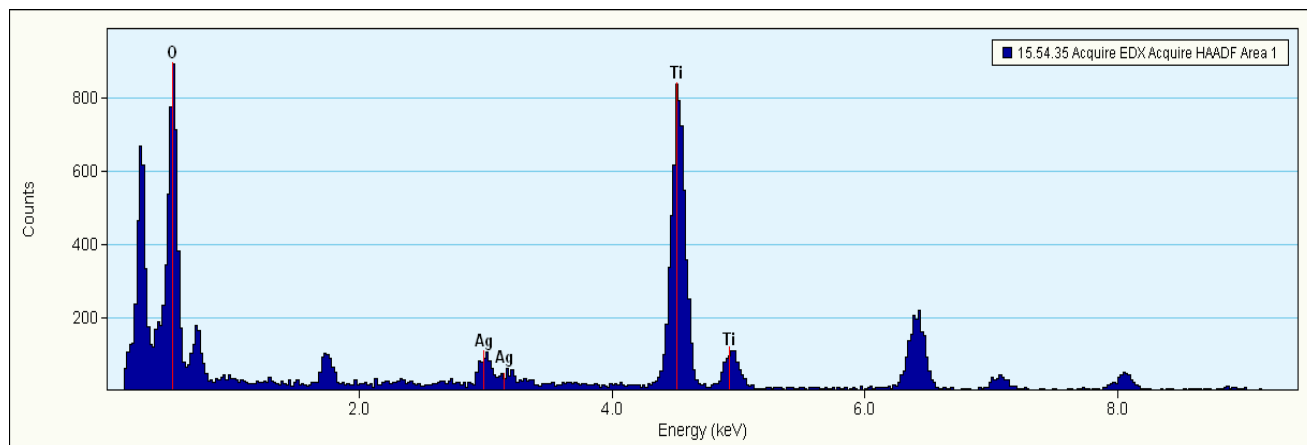

**Fig. S7.** EDX of 1.5 mM Ag@TiO<sub>2</sub> nanocomposites.

**Table S2.** Elemental composition of 1.5 mM Ag@TiO<sub>2</sub> nanocomposites

| Element | Weight % | Atomic % | Uncert. % | Detector correction | k-Factor |
|---------|----------|----------|-----------|---------------------|----------|
| O(K)    | 43.69    | 72.01    | 0.84      | 0.49                | 1.974    |
| Ti(K)   | 46.45    | 25.57    | 0.60      | 0.98                | 1.229    |
| Ag(K)   | 9.85     | 2.40     | 0.59      | 0.98                | 6.491    |

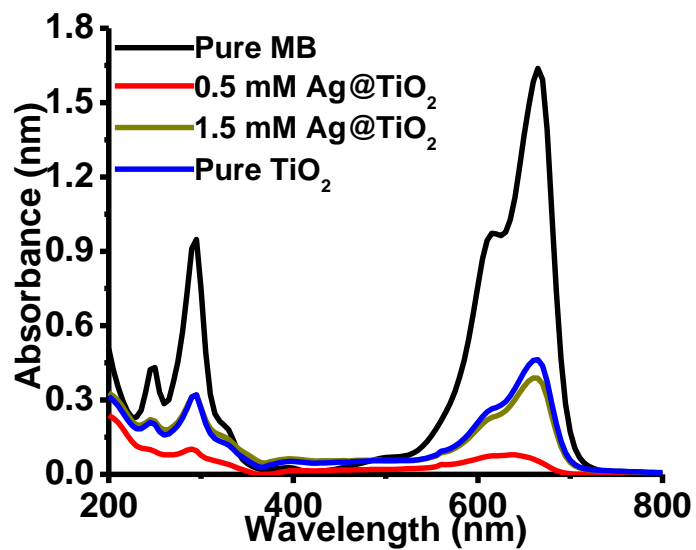

**Fig. S8.** UV-vis spectra show the decrease in the absorbance of MB degradation by 0.5, 1.5 mM Ag@TiO<sub>2</sub> nanocomposite and pure TiO<sub>2</sub> after 4 h of the visible light irradiation.
